# Supplementary material
Source: publisher figshare collection journal article supplement (https://diabetesjournals.figshare.com/ndownloader/files/31765238)
Supplement: Supplementary file 1 [file 31765238]

## Sheet: Table S7A_OCRs
Table S7A. Analysis of enrichment of transcription factor binding sites (TFBSs) in open chromatin regions (OCRs) using HOMER
Motif Name	Consensus	P-value	Log P-value	q-value (Benjamini)	# of Target Sequences with Motif(of 34208)	% of Target Sequences with Motif	# of Background Sequences with Motif(of 33867)	% of Background Sequences with Motif
CTCF(Zf)/CD4+-CTCF-ChIP-Seq(Barski_et_al.)/Homer	AYAGTGCCMYCTRGTGGCCA	1e-1750	-4030	0	3260	0.0953	406.4	0.012
BORIS(Zf)/K562-CTCFL-ChIP-Seq(GSE32465)/Homer	CNNBRGCGCCCCCTGSTGGC	1e-1048	-2414	0	3860	0.1128	1012.2	0.0299
Fli1(ETS)/CD8-FLI-ChIP-Seq(GSE20898)/Homer	NRYTTCCGGH	1e-565	-1303	0	7648	0.2235	4195.3	0.1241
ETS1(ETS)/Jurkat-ETS1-ChIP-Seq(GSE17954)/Homer	ACAGGAAGTG	1e-523	-1206	0	6638	0.194	3533.5	0.1046
Etv2(ETS)/ES-ER71-ChIP-Seq(GSE59402)/Homer(0.967)	NNAYTTCCTGHN	1e-517	-1191	0	5772	0.1687	2912	0.0862
ETV1(ETS)/GIST48-ETV1-ChIP-Seq(GSE22441)/Homer	AACCGGAAGT	1e-510	-1174	0	8181	0.2391	4757.9	0.1408
GABPA(ETS)/Jurkat-GABPa-ChIP-Seq(GSE17954)/Homer	RACCGGAAGT	1e-502	-1158	0	6072	0.1774	3162	0.0936
ERG(ETS)/VCaP-ERG-ChIP-Seq(GSE14097)/Homer	ACAGGAAGTG	1e-490	-1129	0	8645	0.2526	5185.2	0.1534
ETV4(ETS)/HepG2-ETV4-ChIP-Seq(ENCODE)/Homer	ACCGGAAGTG	1e-470	-1083	0	7740	0.2262	4520.7	0.1338
Ets1-distal(ETS)/CD4+-PolII-ChIP-Seq(Barski_et_al.)/Homer	MACAGGAAGT	1e-405	-933.3	0	2244	0.0656	776.4	0.023
EWS:FLI1-fusion(ETS)/SK_N_MC-EWS:FLI1-ChIP-Seq(SRA014231)/Homer	VACAGGAAAT	1e-378	-872.2	0	3814	0.1115	1817.8	0.0538
EWS:ERG-fusion(ETS)/CADO_ES1-EWS:ERG-ChIP-Seq(SRA014231)/Homer	ATTTCCTGTN	1e-376	-866.1	0	3770	0.1102	1792.2	0.053
Elf4(ETS)/BMDM-Elf4-ChIP-Seq(GSE88699)/Homer	ACTTCCKGKT	1e-361	-831.7	0	5836	0.1705	3344.4	0.099
Elk1(ETS)/Hela-Elk1-ChIP-Seq(GSE31477)/Homer	HACTTCCGGY	1e-327	-754.9	0	4648	0.1358	2533.9	0.075
EHF(ETS)/LoVo-EHF-ChIP-Seq(GSE49402)/Homer	AVCAGGAAGT	1e-294	-677	0	6213	0.1816	3849.3	0.1139
ELF1(ETS)/Jurkat-ELF1-ChIP-Seq(SRA014231)/Homer	AVCCGGAAGT	1e-281	-648.9	0	4136	0.1209	2272.1	0.0672
Elk4(ETS)/Hela-Elk4-ChIP-Seq(GSE31477)/Homer	NRYTTCCGGY	1e-266	-613.1	0	4541	0.1327	2622.3	0.0776
ETS(ETS)/Promoter/Homer	AACCGGAAGT	1e-249	-573.4	0	2825	0.0826	1402.8	0.0415
ELF3(ETS)/PDAC-ELF3-ChIP-Seq(GSE64557)/Homer	ANCAGGAAGT	1e-238	-550	0	3556	0.1039	1955.8	0.0579
PU.1(ETS)/ThioMac-PU.1-ChIP-Seq(GSE21512)/Homer	AGAGGAAGTG	1e-237	-546.8	0	2680	0.0783	1326.3	0.0392
SPDEF(ETS)/VCaP-SPDEF-ChIP-Seq(SRA014231)/Homer	ASWTCCTGBT	1e-218	-503.8	0	4630	0.1353	2842.7	0.0841
RUNX1(Runt)/Jurkat-RUNX1-ChIP-Seq(GSE29180)/Homer	AAACCACARM	1e-213	-490.7	0	3979	0.1163	2351.6	0.0696
ELF5(ETS)/T47D-ELF5-ChIP-Seq(GSE30407)/Homer	ACVAGGAAGT	1e-194	-447.1	0	3635	0.1062	2145	0.0635
RUNX-AML(Runt)/CD4+-PolII-ChIP-Seq(Barski_et_al.)/Homer	GCTGTGGTTW	1e-189	-436.1	0	2844	0.0831	1561.4	0.0462
RUNX2(Runt)/PCa-RUNX2-ChIP-Seq(GSE33889)/Homer	NWAACCACADNN	1e-184	-423.8	0	3069	0.0897	1744.9	0.0516
ETS:RUNX(ETS,Runt)/Jurkat-RUNX1-ChIP-Seq(GSE17954)/Homer	RCAGGATGTGGT	1e-183	-423.2	0	890	0.026	279.3	0.0083
RUNX(Runt)/HPC7-Runx1-ChIP-Seq(GSE22178)/Homer	SAAACCACAG	1e-165	-380.1	0	2903	0.0848	1675.2	0.0496
IRF2(IRF)/Erythroblas-IRF2-ChIP-Seq(GSE36985)/Homer	GAAASYGAAASY	1e-117	-269.4	0	666	0.0195	232.2	0.0069
IRF1(IRF)/PBMC-IRF1-ChIP-Seq(GSE43036)/Homer	GAAAGTGAAAGT	1e-115	-266.6	0	765	0.0224	291.7	0.0086
ISRE(IRF)/ThioMac-LPS-Expression(GSE23622)/Homer	AGTTTCASTTTC	1e-96	-222.4	0	420	0.0123	122.8	0.0036
IRF3(IRF)/BMDM-Irf3-ChIP-Seq(GSE67343)/Homer	AGTTTCAKTTTC	1e-92	-212.9	0	1334	0.039	717.3	0.0212
IRF8(IRF)/BMDM-IRF8-ChIP-Seq(GSE77884)/Homer	GRAASTGAAAST	1e-83	-192.5	0	1432	0.0418	814.5	0.0241
Sp5(Zf)/mES-Sp5.Flag-ChIP-Seq(GSE72989)/Homer	RGKGGGCGGAGC	1e-77	-178.5	0	6875	0.2009	5493.3	0.1625
Tcf7(HMG)/GM12878-TCF7-ChIP-Seq(Encode)/Homer	CTTTGATGTGSB	1e-71	-164.8	0	1140	0.0333	633.2	0.0187
SpiB(ETS)/OCILY3-SPIB-ChIP-Seq(GSE56857)/Homer	AAAGRGGAAGTG	1e-70	-162.7	0	1086	0.0317	596.4	0.0176
LEF1(HMG)/H1-LEF1-ChIP-Seq(GSE64758)/Homer	CCTTTGATST	1e-62	-143	0	2042	0.0597	1374.9	0.0407
PU.1-IRF(ETS:IRF)/Bcell-PU.1-ChIP-Seq(GSE21512)/Homer	MGGAAGTGAAAC	1e-59	-136	0	4681	0.1368	3666.2	0.1085
Sp2(Zf)/HEK293-Sp2.eGFP-ChIP-Seq(Encode)/Homer	YGGCCCCGCCCC	1e-54	-126.2	0	9458	0.2764	8100.6	0.2397
PU.1:IRF8(ETS:IRF)/pDC-Irf8-ChIP-Seq(GSE66899)/Homer	GGAAGTGAAAST	1e-54	-124.5	0	835	0.0244	459.9	0.0136
YY1(Zf)/Promoter/Homer	CAAGATGGCGGC	1e-52	-122	0	514	0.015	237.1	0.007
Tgif2(Homeobox)/mES-Tgif2-ChIP-Seq(GSE55404)/Homer	TGTCANYT	1e-49	-113.6	0	9270	0.2709	7986.4	0.2363
Sp1(Zf)/Promoter/Homer	GGCCCCGCCCCC	1e-47	-108.3	0	2852	0.0833	2143.7	0.0634
KLF3(Zf)/MEF-Klf3-ChIP-Seq(GSE44748)/Homer	NRGCCCCRCCCHBNN	1e-46	-107.1	0	3326	0.0972	2561.8	0.0758
Tcf3(HMG)/mES-Tcf3-ChIP-Seq(GSE11724)/Homer	ASWTCAAAGG	1e-44	-103.3	0	858	0.0251	504.3	0.0149
CTCF-SatelliteElement(Zf?)/CD4+-CTCF-ChIP-Seq(Barski_et_al.)/Homer	TGCAGTTCCMVNWRTGGCCA	1e-44	-103	0	137	0.004	30	0.0009
KLF14(Zf)/HEK293-KLF14.GFP-ChIP-Seq(GSE58341)/Homer	RGKGGGCGKGGC	1e-39	-91.48	0	10221	0.2987	9010.7	0.2666
IRF4(IRF)/GM12878-IRF4-ChIP-Seq(GSE32465)/Homer	ACTGAAACCA	1e-38	-89.73	0	1385	0.0405	946.4	0.028
Klf9(Zf)/GBM-Klf9-ChIP-Seq(GSE62211)/Homer	GCCACRCCCACY	1e-35	-80.63	0	2535	0.0741	1952.6	0.0578
KLF5(Zf)/LoVo-KLF5-ChIP-Seq(GSE49402)/Homer	DGGGYGKGGC	1e-33	-77.28	0	7716	0.2255	6720.7	0.1989
Foxo1(Forkhead)/RAW-Foxo1-ChIP-Seq(Fan_et_al.)/Homer	CTGTTTAC	1e-32	-75.6	0	5490	0.1604	4649.2	0.1376
KLF6(Zf)/PDAC-KLF6-ChIP-Seq(GSE64557)/Homer	MKGGGYGTGGCC	1e-29	-67.68	0	6522	0.1906	5654.7	0.1673
Rfx2(HTH)/LoVo-RFX2-ChIP-Seq(GSE49402)/Homer	GTTGCCATGGCAACM	1e-29	-67.44	0	499	0.0146	284.5	0.0084
Tgif1(Homeobox)/mES-Tgif1-ChIP-Seq(GSE55404)/Homer	YTGWCADY	1e-28	-64.91	0	8117	0.2372	7176.2	0.2123
SCL(bHLH)/HPC7-Scl-ChIP-Seq(GSE13511)/Homer	AVCAGCTG	1e-27	-64.13	0	15312	0.4475	14126.2	0.418
Rfx5(HTH)/GM12878-Rfx5-ChIP-Seq(GSE31477)/Homer	SCCTAGCAACAG	1e-27	-63.44	0	1077	0.0315	750.6	0.0222
TCFL2(HMG)/K562-TCF7L2-ChIP-Seq(GSE29196)/Homer	ACWTCAAAGG	1e-26	-60.81	0	299	0.0087	148.8	0.0044
RFX(HTH)/K562-RFX3-ChIP-Seq(SRA012198)/Homer	CGGTTGCCATGGCAAC	1e-25	-59.58	0	474	0.0139	276.2	0.0082
Klf4(Zf)/mES-Klf4-ChIP-Seq(GSE11431)/Homer	GCCACACCCA	1e-24	-57.04	0	1988	0.0581	1551.8	0.0459
Tbx5(T-box)/HL1-Tbx5.biotin-ChIP-Seq(GSE21529)/Homer	AGGTGTCA	1e-23	-53.7	0	10258	0.2998	9304.5	0.2753
Meis1(Homeobox)/MastCells-Meis1-ChIP-Seq(GSE48085)/Homer	VGCTGWCAVB	1e-22	-52.84	0	4904	0.1433	4229.8	0.1252
Fra1(bZIP)/BT549-Fra1-ChIP-Seq(GSE46166)/Homer	NNATGASTCATH	1e-22	-50.9	0	1301	0.038	972.5	0.0288
AP-1(bZIP)/ThioMac-PU.1-ChIP-Seq(GSE21512)/Homer	VTGACTCATC	1e-21	-50.51	0	1703	0.0498	1323.5	0.0392
PRDM1(Zf)/Hela-PRDM1-ChIP-Seq(GSE31477)/Homer	ACTTTCACTTTC	1e-20	-47.98	0	1652	0.0483	1287.9	0.0381
NFY(CCAAT)/Promoter/Homer	RGCCAATSRG	1e-20	-47.96	0	2428	0.071	1979.4	0.0586
bZIP:IRF(bZIP,IRF)/Th17-BatF-ChIP-Seq(GSE39756)/Homer	NAGTTTCABTHTGACTNW	1e-20	-47.83	0	1084	0.0317	795.7	0.0235
MITF(bHLH)/MastCells-MITF-ChIP-Seq(GSE48085)/Homer	RTCATGTGAC	1e-20	-47.8	0	2708	0.0791	2233	0.0661
BATF(bZIP)/Th17-BATF-ChIP-Seq(GSE39756)/Homer	DATGASTCAT	1e-19	-44.93	0	1468	0.0429	1136.5	0.0336
Fra2(bZIP)/Striatum-Fra2-ChIP-Seq(GSE43429)/Homer	GGATGACTCATC	1e-19	-44.2	0	1114	0.0326	831.4	0.0246
Unknown-ESC-element(?)/mES-Nanog-ChIP-Seq(GSE11724)/Homer	CACAGCAGGGGG	1e-18	-43.46	0	2387	0.0698	1962.8	0.0581
Fosl2(bZIP)/3T3L1-Fosl2-ChIP-Seq(GSE56872)/Homer	NATGASTCABNN	1e-18	-42.9	0	825	0.0241	589.4	0.0174
Ronin(THAP)/ES-Thap11-ChIP-Seq(GSE51522)/Homer	RACTACAACTCCCAGVAKGC	1e-18	-41.71	0	286	0.0084	160.5	0.0047
Maz(Zf)/HepG2-Maz-ChIP-Seq(GSE31477)/Homer	GGGGGGGG	1e-17	-41.43	0	8346	0.2439	7569.3	0.224
THRb(NR)/HepG2-THRb.Flag-ChIP-Seq(Encode)/Homer	GGTCACCTGAGGTCA	1e-17	-40.55	0	2371	0.0693	1961	0.058
JunB(bZIP)/DendriticCells-Junb-ChIP-Seq(GSE36099)/Homer	RATGASTCAT	1e-17	-39.29	0	1269	0.0371	981.1	0.029
Atf3(bZIP)/GBM-ATF3-ChIP-Seq(GSE33912)/Homer	DATGASTCATHN	1e-16	-37.96	0	1504	0.044	1194	0.0353
Stat3+il21(Stat)/CD4-Stat3-ChIP-Seq(GSE19198)/Homer	SVYTTCCNGGAARB	1e-16	-37.17	0	2220	0.0649	1841	0.0545
Rfx6(HTH)/Min6b1-Rfx6.HA-ChIP-Seq(GSE62844)/Homer	TGTTKCCTAGCAACM	1e-15	-36.14	0	3840	0.1122	3340.7	0.0988
Jun-AP1(bZIP)/K562-cJun-ChIP-Seq(GSE31477)/Homer	GATGASTCATCN	1e-15	-34.9	0	586	0.0171	409.2	0.0121
Smad3(MAD)/NPC-Smad3-ChIP-Seq(GSE36673)/Homer	TWGTCTGV	1e-14	-33.46	0	8391	0.2452	7684.6	0.2274
Atf7(bZIP)/3T3L1-Atf7-ChIP-Seq(GSE56872)/Homer	NGRTGACGTCAY	1e-14	-32.48	0	1292	0.0378	1026.5	0.0304
GFY-Staf(?,Zf)/Promoter/Homer	RACTACAATTCCCAGAAKGC	1e-13	-31.92	0	334	0.0098	211.3	0.0063
Atf1(bZIP)/K562-ATF1-ChIP-Seq(GSE31477)/Homer	GATGACGTCA	1e-13	-30.96	0	1828	0.0534	1514.8	0.0448
STAT4(Stat)/CD4-Stat4-ChIP-Seq(GSE22104)/Homer	NYTTCCWGGAAR	1e-13	-30.21	0	2630	0.0769	2254	0.0667
X-box(HTH)/NPC-H3K4me1-ChIP-Seq(GSE16256)/Homer	GGTTGCCATGGCAA	1e-12	-29.76	0	436	0.0127	297.2	0.0088
CEBP:AP1(bZIP)/ThioMac-CEBPb-ChIP-Seq(GSE21512)/Homer	DRTGTTGCAA	1e-12	-29.16	0	1706	0.0499	1412.1	0.0418
HIC1(Zf)/Treg-ZBTB29-ChIP-Seq(GSE99889)/Homer	TGCCAGCB	1e-12	-28.91	0	8178	0.239	7524.4	0.2226
Atf2(bZIP)/3T3L1-Atf2-ChIP-Seq(GSE56872)/Homer	NRRTGACGTCAT	1e-12	-28.51	0	933	0.0273	724.1	0.0214
Atf4(bZIP)/MEF-Atf4-ChIP-Seq(GSE35681)/Homer	MTGATGCAAT	1e-12	-28.26	0	622	0.0182	456.2	0.0135
ETS:E-box(ETS,bHLH)/HPC7-Scl-ChIP-Seq(GSE22178)/Homer	AGGAARCAGCTG	1e-11	-26.97	0	324	0.0095	212	0.0063
PRDM9(Zf)/Testis-DMC1-ChIP-Seq(GSE35498)/Homer	ADGGYAGYAGCATCT	1e-11	-26.92	0	1429	0.0418	1172.6	0.0347
NeuroD1(bHLH)/Islet-NeuroD1-ChIP-Seq(GSE30298)/Homer	GCCATCTGTT	1e-11	-26.66	0	2697	0.0788	2337.3	0.0692
GATA3(Zf)/iTreg-Gata3-ChIP-Seq(GSE20898)/Homer	AGATAASR	1e-11	-26.65	0	3248	0.0949	2851.1	0.0844
BMYB(HTH)/Hela-BMYB-ChIP-Seq(GSE27030)/Homer	NHAACBGYYV	1e-11	-26.5	0	4429	0.1294	3964.6	0.1173
GATA(Zf),IR3/iTreg-Gata3-ChIP-Seq(GSE20898)/Homer	NNNNNBAGATAWYATCTVHN	1e-11	-26.45	0	314	0.0092	205.1	0.0061
NFIL3(bZIP)/HepG2-NFIL3-ChIP-Seq(Encode)/Homer	VTTACGTAAYNNNNN	1e-11	-26.35	0	1477	0.0432	1218.3	0.036
EKLF(Zf)/Erythrocyte-Klf1-ChIP-Seq(GSE20478)/Homer	NWGGGTGTGGCY	1e-11	-26.05	0	809	0.0236	624.1	0.0185
GLIS3(Zf)/Thyroid-Glis3.GFP-ChIP-Seq(GSE103297)/Homer	CTCCCTGGGAGGCCN	1e-10	-24.61	0	7246	0.2118	6672.7	0.1974
GATA(Zf),IR4/iTreg-Gata3-ChIP-Seq(GSE20898)/Homer	NAGATWNBNATCTNN	1e-10	-24.37	0	189	0.0055	111.1	0.0033
MYB(HTH)/ERMYB-Myb-ChIPSeq(GSE22095)/Homer	GGCVGTTR	1e-10	-24.18	0	5518	0.1613	5020.1	0.1485
Bcl11a(Zf)/HSPC-BCL11A-ChIP-Seq(GSE104676)/Homer	TYTGACCASWRG	1e-10	-23.94	0	2073	0.0606	1776.2	0.0526
FOXP1(Forkhead)/H9-FOXP1-ChIP-Seq(GSE31006)/Homer	NYYTGTTTACHN	1e-10	-23.45	0	957	0.028	765	0.0226
Rfx1(HTH)/NPC-H3K4me1-ChIP-Seq(GSE16256)/Homer	KGTTGCCATGGCAA	1e-09	-22.99	0	766	0.0224	597.7	0.0177
Gata2(Zf)/K562-GATA2-ChIP-Seq(GSE18829)/Homer	BBCTTATCTS	1e-09	-22.86	0	1369	0.04	1137	0.0336
NFkB-p65(RHD)/GM12787-p65-ChIP-Seq(GSE19485)/Homer	WGGGGATTTCCC	1e-09	-22.15	0	1700	0.0497	1443.7	0.0427
Chop(bZIP)/MEF-Chop-ChIP-Seq(GSE35681)/Homer	ATTGCATCAT	1e-09	-22.04	0	490	0.0143	361.4	0.0107
STAT1(Stat)/HelaS3-STAT1-ChIP-Seq(GSE12782)/Homer	NATTTCCNGGAAAT	1e-09	-21.67	0	798	0.0233	630.6	0.0187
Zic3(Zf)/mES-Zic3-ChIP-Seq(GSE37889)/Homer	GGCCYCCTGCTGDGH	1e-09	-21.62	0	3075	0.0899	2726.9	0.0807
Gata6(Zf)/HUG1N-GATA6-ChIP-Seq(GSE51936)/Homer	YCTTATCTBN	1e-09	-20.86	0	1926	0.0563	1659.5	0.0491
Gata1(Zf)/K562-GATA1-ChIP-Seq(GSE18829)/Homer	SAGATAAGRV	1e-08	-20.45	0	1206	0.0352	1001.6	0.0296
Ascl1(bHLH)/NeuralTubes-Ascl1-ChIP-Seq(GSE55840)/Homer	NNVVCAGCTGBN	1e-08	-20.08	0	6121	0.1789	5640.6	0.1669
GFY(?)/Promoter/Homer	ACTACAATTCCC	1e-08	-19.4	0	348	0.0102	248.2	0.0073
Gata4(Zf)/Heart-Gata4-ChIP-Seq(GSE35151)/Homer	NBWGATAAGR	1e-08	-19.36	0	2118	0.0619	1847.9	0.0547
CHR(?)/Hela-CellCycle-Expression/Homer	SRGTTTCAAA	1e-08	-18.94	0	1533	0.0448	1309	0.0387
Foxo3(Forkhead)/U2OS-Foxo3-ChIP-Seq(E-MTAB-2701)/Homer	DGTAAACA	1e-08	-18.47	0	1646	0.0481	1415.2	0.0419
Foxf1(Forkhead)/Lung-Foxf1-ChIP-Seq(GSE77951)/Homer	WWATRTAAACAN	1e-07	-18.06	0	1844	0.0539	1601.8	0.0474
CRE(bZIP)/Promoter/Homer	CSGTGACGTCAC	1e-07	-17.73	0	934	0.0273	768	0.0227
Nkx3.1(Homeobox)/LNCaP-Nkx3.1-ChIP-Seq(GSE28264)/Homer	AAGCACTTAA	1e-07	-17.67	0	6276	0.1834	5818	0.1721
E2F4(E2F)/K562-E2F4-ChIP-Seq(GSE31477)/Homer	GGCGGGAAAH	1e-07	-17.29	0	3016	0.0881	2706.1	0.0801
TFE3(bHLH)/MEF-TFE3-ChIP-Seq(GSE75757)/Homer	GTCACGTGACYV	1e-07	-17.25	0	295	0.0086	209	0.0062
AMYB(HTH)/Testes-AMYB-ChIP-Seq(GSE44588)/Homer	TGGCAGTTGG	1e-07	-16.85	0	4472	0.1307	4095.1	0.1212
Egr1(Zf)/K562-Egr1-ChIP-Seq(GSE32465)/Homer	TGCGTGGGYG	1e-07	-16.77	0	3793	0.1108	3449	0.102
PGR(NR)/EndoStromal-PGR-ChIP-Seq(GSE69539)/Homer	AAGAACATWHTGTTC	1e-06	-15.3	0	516	0.0151	405.9	0.012
Egr2(Zf)/Thymocytes-Egr2-ChIP-Seq(GSE34254)/Homer	NGCGTGGGCGGR	1e-06	-15.28	0	1129	0.033	958.2	0.0284
Foxa2(Forkhead)/Liver-Foxa2-ChIP-Seq(GSE25694)/Homer	CYTGTTTACWYW	1e-06	-14.73	0	1745	0.051	1532.5	0.0453
Hoxa10(Homeobox)/ChickenMSG-Hoxa10.Flag-ChIP-Seq(GSE86088)/Homer	GGYAATGAAA	1e-06	-14.72	0	1296	0.0379	1115.9	0.033
Ptf1a(bHLH)/Panc1-Ptf1a-ChIP-Seq(GSE47459)/Homer	ACAGCTGTTN	1e-06	-14.65	0	9599	0.2805	9080.5	0.2687
Tbx20(T-box)/Heart-Tbx20-ChIP-Seq(GSE29636)/Homer	GGTGYTGACAGS	1e-06	-14.4	0	656	0.0192	533.4	0.0158
GFX(?)/Promoter/Homer	ATTCTCGCGAGA	1e-06	-14.18	0	105	0.0031	62.1	0.0018
T1ISRE(IRF)/ThioMac-Ifnb-Expression/Homer	ACTTTCGTTTCT	1e-06	-14.17	0	52	0.0015	24.2	0.0007
c-Jun-CRE(bZIP)/K562-cJun-ChIP-Seq(GSE31477)/Homer	ATGACGTCATCY	1e-06	-14.1	0	760	0.0222	628.6	0.0186
CDX4(Homeobox)/ZebrafishEmbryos-Cdx4.Myc-ChIP-Seq(GSE48254)/Homer	NGYCATAAAWCH	1e-06	-13.85	0	1753	0.0512	1546.9	0.0458
E2F6(E2F)/Hela-E2F6-ChIP-Seq(GSE31477)/Homer	GGCGGGAARN	1e-05	-13.74	0	3288	0.0961	2998.3	0.0887
Sox6(HMG)/Myotubes-Sox6-ChIP-Seq(GSE32627)/Homer	CCATTGTTNY	1e-05	-13.53	0	3708	0.1084	3401.3	0.1006
NFkB-p65-Rel(RHD)/ThioMac-LPS-Expression(GSE23622)/Homer	GGAAATTCCC	1e-05	-13.29	0	214	0.0063	151.3	0.0045
Hoxa11(Homeobox)/ChickenMSG-Hoxa11.Flag-ChIP-Seq(GSE86088)/Homer	TTTTATGGCM	1e-05	-13.24	0	5238	0.1531	4873.5	0.1442
RORgt(NR)/EL4-RORgt.Flag-ChIP-Seq(GSE56019)/Homer	AAYTAGGTCA	1e-05	-13.21	0	279	0.0082	206.6	0.0061
RORgt(NR)/EL4-RORgt.Flag-ChIP-Seq(GSE56019)/Homer	AAYTAGGTCA	1e-05	-13.21	0	279	0.0082	206.6	0.0061
Mef2c(MADS)/GM12878-Mef2c-ChIP-Seq(GSE32465)/Homer	DCYAAAAATAGM	1e-05	-13.2	0	853	0.0249	717.6	0.0212
FoxL2(Forkhead)/Ovary-FoxL2-ChIP-Seq(GSE60858)/Homer	WWTRTAAACAVG	1e-05	-12.86	0	1684	0.0492	1489.3	0.0441
Tcf12(bHLH)/GM12878-Tcf12-ChIP-Seq(GSE32465)/Homer	VCAGCTGYTG	1e-05	-12.8	0	3877	0.1133	3571.6	0.1057
Sox10(HMG)/SciaticNerve-Sox3-ChIP-Seq(GSE35132)/Homer	CCWTTGTYYB	1e-05	-12.53	0	3928	0.1148	3623.8	0.1072
KLF10(Zf)/HEK293-KLF10.GFP-ChIP-Seq(GSE58341)/Homer	GGGGGTGTGTCC	1e-05	-12.45	0	2423	0.0708	2189.5	0.0648
NFkB-p50,p52(RHD)/Monocyte-p50-ChIP-Chip(Schreiber_et_al.)/Homer	GGGGGAATCCCC	1e-05	-12.02	0	624	0.0182	515.2	0.0152
Gfi1b(Zf)/HPC7-Gfi1b-ChIP-Seq(GSE22178)/Homer	MAATCACTGC	1e-05	-11.92	0	1546	0.0452	1367.7	0.0405
HLF(bZIP)/HSC-HLF.Flag-ChIP-Seq(GSE69817)/Homer	RTTATGYAAB	1e-05	-11.87	0	1681	0.0491	1494.4	0.0442
FOXK1(Forkhead)/HEK293-FOXK1-ChIP-Seq(GSE51673)/Homer	NVWTGTTTAC	1e-05	-11.65	0	2282	0.0667	2063.5	0.0611
STAT5(Stat)/mCD4+-Stat5-ChIP-Seq(GSE12346)/Homer	RTTTCTNAGAAA	0.0001	-11.22	0	878	0.0257	751.5	0.0222
Mef2d(MADS)/Retina-Mef2d-ChIP-Seq(GSE61391)/Homer	GCTATTTTTAGC	0.0001	-11.11	0	394	0.0115	313.9	0.0093
Oct6(POU,Homeobox)/NPC-Pou3f1-ChIP-Seq(GSE35496)/Homer	WATGCAAATGAG	0.0001	-11.02	0	770	0.0225	653	0.0193
FOXA1(Forkhead)/LNCAP-FOXA1-ChIP-Seq(GSE27824)/Homer	WAAGTAAACA	0.0001	-10.91	0.0001	2386	0.0697	2169.2	0.0642
Sox3(HMG)/NPC-Sox3-ChIP-Seq(GSE33059)/Homer	CCWTTGTY	0.0001	-10.89	0.0001	4144	0.1211	3851.5	0.114
FOXK2(Forkhead)/U2OS-FOXK2-ChIP-Seq(E-MTAB-2204)/Homer	SCHTGTTTACAT	0.0001	-10.81	0.0001	1544	0.0451	1374.6	0.0407
Pbx3(Homeobox)/GM12878-PBX3-ChIP-Seq(GSE32465)/Homer	SCTGTCAMTCAN	0.0001	-10.8	0.0001	602	0.0176	501.1	0.0148
Sox17(HMG)/Endoderm-Sox17-ChIP-Seq(GSE61475)/Homer	CCATTGTTYB	0.0001	-10.79	0.0001	1497	0.0437	1330.6	0.0394
IRF:BATF(IRF:bZIP)/pDC-Irf8-ChIP-Seq(GSE66899)/Homer	CTTTCANTATGACTV	0.0001	-10.68	0.0001	315	0.0092	245	0.0073
CLOCK(bHLH)/Liver-Clock-ChIP-Seq(GSE39860)/Homer	GHCACGTG	0.0001	-10.67	0.0001	1769	0.0517	1587.1	0.047
Eomes(T-box)/H9-Eomes-ChIP-Seq(GSE26097)/Homer	ATTAACACCT	0.0001	-10.06	0.0001	5273	0.1541	4952	0.1465
Olig2(bHLH)/Neuron-Olig2-ChIP-Seq(GSE30882)/Homer	RCCATMTGTT	0.0001	-10.05	0.0001	5369	0.1569	5045.9	0.1493
Hoxd11(Homeobox)/ChickenMSG-Hoxd11.Flag-ChIP-Seq(GSE86088)/Homer	VGCCATAAAA	0.0001	-9.843	0.0001	5503	0.1608	5178.4	0.1532
Usf2(bHLH)/C2C12-Usf2-ChIP-Seq(GSE36030)/Homer	GTCACGTGGT	0.0001	-9.818	0.0001	956	0.0279	832.9	0.0246
Foxa3(Forkhead)/Liver-Foxa3-ChIP-Seq(GSE77670)/Homer	BSNTGTTTACWYWGN	0.0001	-9.715	0.0002	655	0.0191	555.6	0.0164
Tbet(T-box)/CD8-Tbet-ChIP-Seq(GSE33802)/Homer	AGGTGTGAAM	0.0001	-9.512	0.0002	2532	0.074	2323.9	0.0688
Sox15(HMG)/CPA-Sox15-ChIP-Seq(GSE62909)/Homer	RAACAATGGN	0.0001	-9.496	0.0002	2363	0.0691	2162.3	0.064
Stat3(Stat)/mES-Stat3-ChIP-Seq(GSE11431)/Homer	CTTCCGGGAA	0.0001	-9.405	0.0002	1706	0.0499	1539.6	0.0456
STAT6(Stat)/CD4-Stat6-ChIP-Seq(GSE22104)/Homer	ABTTCYYRRGAA	0.0001	-9.382	0.0002	1375	0.0402	1227.8	0.0363
Smad2(MAD)/ES-SMAD2-ChIP-Seq(GSE29422)/Homer	CTGTCTGG	0.0001	-9.364	0.0002	5085	0.1486	4781.2	0.1415
TATA-Box(TBP)/Promoter/Homer	CCTTTTAWAGSC	0.001	-9.202	0.0003	3057	0.0893	2829.7	0.0837
Oct4(POU,Homeobox)/mES-Oct4-ChIP-Seq(GSE11431)/Homer	ATTTGCATAW	0.001	-9.177	0.0003	891	0.026	777	0.023
Brn1(POU,Homeobox)/NPC-Brn1-ChIP-Seq(GSE35496)/Homer	TATGCWAATBAV	0.001	-8.856	0.0003	558	0.0163	471.6	0.014
Six2(Homeobox)/NephronProgenitor-Six2-ChIP-Seq(GSE39837)/Homer	GWAAYHTGAKMC	0.001	-8.688	0.0004	2365	0.0691	2173.2	0.0643
STAT6(Stat)/Macrophage-Stat6-ChIP-Seq(GSE38377)/Homer	TTCCKNAGAA	0.001	-8.565	0.0005	1429	0.0418	1285.1	0.038
GATA:SCL(Zf,bHLH)/Ter119-SCL-ChIP-Seq(GSE18720)/Homer	CRGCTGBNGNSNNSAGATAA	0.001	-8.51	0.0005	263	0.0077	207.5	0.0061
Fox:Ebox(Forkhead,bHLH)/Panc1-Foxa2-ChIP-Seq(GSE47459)/Homer	NNNVCTGWGYAAACASN	0.001	-8.477	0.0005	2177	0.0636	1997	0.0591
Hoxa9(Homeobox)/ChickenMSG-Hoxa9.Flag-ChIP-Seq(GSE86088)/Homer	RGCAATNAAA	0.001	-8.413	0.0005	6221	0.1818	5899.1	0.1745
WT1(Zf)/Kidney-WT1-ChIP-Seq(GSE90016)/Homer	MCTCCCMCRCAB	0.001	-8.377	0.0005	2925	0.0855	2713.8	0.0803
Zic(Zf)/Cerebellum-ZIC1.2-ChIP-Seq(GSE60731)/Homer	CCTGCTGAGH	0.001	-8.071	0.0007	3028	0.0885	2816.5	0.0833
Tlx?(NR)/NPC-H3K4me1-ChIP-Seq(GSE16256)/Homer	CTGGCAGSCTGCCA	0.001	-8.025	0.0008	1267	0.037	1137	0.0336
Max(bHLH)/K562-Max-ChIP-Seq(GSE31477)/Homer	RCCACGTGGYYN	0.001	-7.919	0.0008	1904	0.0556	1742	0.0515
MafB(bZIP)/BMM-Mafb-ChIP-Seq(GSE75722)/Homer	WNTGCTGASTCAGCANWTTY	0.001	-7.892	0.0009	848	0.0248	745.8	0.0221
HOXB13(Homeobox)/ProstateTumor-HOXB13-ChIP-Seq(GSE56288)/Homer	TTTTATKRGG	0.001	-7.598	0.0012	2205	0.0644	2033.4	0.0602
CEBP:CEBP(bZIP)/MEF-Chop-ChIP-Seq(GSE35681)/Homer	NTNATGCAAYMNNHTGMAAY	0.001	-7.543	0.0012	316	0.0092	258.2	0.0076
E-box(bHLH)/Promoter/Homer	SSGGTCACGTGA	0.001	-7.507	0.0012	358	0.0105	296.1	0.0088
Zac1(Zf)/Neuro2A-Plagl1-ChIP-Seq(GSE75942)/Homer	HAWGRGGCCM	0.001	-7.478	0.0013	11336	0.3313	10917.1	0.323
USF1(bHLH)/GM12878-Usf1-ChIP-Seq(GSE32465)/Homer	SGTCACGTGR	0.001	-7.423	0.0013	1522	0.0445	1384.5	0.041
JunD(bZIP)/K562-JunD-ChIP-Seq/Homer	ATGACGTCATCN	0.001	-7.398	0.0014	293	0.0086	238.2	0.007
Bach2(bZIP)/OCILy7-Bach2-ChIP-Seq(GSE44420)/Homer	TGCTGAGTCA	0.001	-7.324	0.0015	445	0.013	376.9	0.0112
PBX1(Homeobox)/MCF7-PBX1-ChIP-Seq(GSE28007)/Homer	GSCTGTCACTCA	0.001	-7.221	0.0016	218	0.0064	172.4	0.0051
Sox2(HMG)/mES-Sox2-ChIP-Seq(GSE11431)/Homer	BCCATTGTTC	0.001	-7.214	0.0016	1992	0.0582	1834.5	0.0543
E2F3(E2F)/MEF-E2F3-ChIP-Seq(GSE71376)/Homer	BTKGGCGGGAAA	0.001	-7.136	0.0017	3743	0.1094	3519.6	0.1041
Hoxd12(Homeobox)/ChickenMSG-Hoxd12.Flag-ChIP-Seq(GSE86088)/Homer	HDGYAATGAAAN	0.001	-7.112	0.0018	3905	0.1141	3676.5	0.1088
Smad4(MAD)/ESC-SMAD4-ChIP-Seq(GSE29422)/Homer	VBSYGTCTGG	0.001	-7.079	0.0018	5192	0.1517	4924.1	0.1457
NeuroG2(bHLH)/Fibroblast-NeuroG2-ChIP-Seq(GSE75910)/Homer	ACCATCTGTT	0.001	-7.068	0.0018	4494	0.1313	4247.1	0.1257
GRE(NR),IR3/RAW264.7-GRE-ChIP-Seq(Unpublished)/Homer	VAGRACAKWCTGTYC	0.001	-6.91	0.0021	510	0.0149	438.7	0.013
FOXA1(Forkhead)/MCF7-FOXA1-ChIP-Seq(GSE26831)/Homer	WAAGTAAACA	0.01	-6.863	0.0022	1906	0.0557	1756.7	0.052
FOXM1(Forkhead)/MCF7-FOXM1-ChIP-Seq(GSE72977)/Homer	TRTTTACTTW	0.01	-6.803	0.0024	1991	0.0582	1838.6	0.0544
Cdx2(Homeobox)/mES-Cdx2-ChIP-Seq(GSE14586)/Homer	GYMATAAAAH	0.01	-6.508	0.0031	1253	0.0366	1138.7	0.0337
MyoD(bHLH)/Myotube-MyoD-ChIP-Seq(GSE21614)/Homer	RRCAGCTGYTSY	0.01	-6.466	0.0033	2951	0.0862	2765.9	0.0818
GATA3(Zf),DR4/iTreg-Gata3-ChIP-Seq(GSE20898)/Homer	AGATGKDGAGATAAG	0.01	-6.391	0.0035	144	0.0042	110.1	0.0033
Hoxa13(Homeobox)/ChickenMSG-Hoxa13.Flag-ChIP-Seq(GSE86088)/Homer	CYHATAAAAN	0.01	-6.381	0.0035	5541	0.1619	5277.6	0.1562
Zfp281(Zf)/ES-Zfp281-ChIP-Seq(GSE81042)/Homer	CCCCTCCCCCAC	0.01	-6.338	0.0037	986	0.0288	887.9	0.0263
ZNF528(Zf)/HEK293-ZNF528.GFP-ChIP-Seq(GSE58341)/Homer	AGAAATGACTTCCCT	0.01	-6.311	0.0037	18	0.0005	8.7	0.0003
BMAL1(bHLH)/Liver-Bmal1-ChIP-Seq(GSE39860)/Homer	GNCACGTG	0.01	-6.072	0.0047	4715	0.1378	4480.6	0.1326
Twist(bHLH)/HMLE-TWIST1-ChIP-Seq(Chang_et_al)/Homer	VCAKCTGGNNNCCAGMTGBN	0.01	-6.042	0.0048	362	0.0106	307.9	0.0091
Hoxd10(Homeobox)/ChickenMSG-Hoxd10.Flag-ChIP-Seq(GSE86088)/Homer	GGCMATGAAA	0.01	-5.988	0.0051	2544	0.0743	2380.3	0.0704
ARE(NR)/LNCAP-AR-ChIP-Seq(GSE27824)/Homer	RGRACASNSTGTYCYB	0.01	-5.935	0.0053	598	0.0175	526.9	0.0156
Pitx1:Ebox(Homeobox,bHLH)/Hindlimb-Pitx1-ChIP-Seq(GSE41591)/Homer	YTAATTRAWWCCAGATGT	0.01	-5.844	0.0058	351	0.0103	298.5	0.0088
Pknox1(Homeobox)/ES-Prep1-ChIP-Seq(GSE63282)/Homer	SCTGTCAVTCAV	0.01	-5.771	0.0062	616	0.018	544.8	0.0161
MafF(bZIP)/HepG2-MafF-ChIP-Seq(GSE31477)/Homer	HWWGTCAGCAWWTTT	0.01	-5.771	0.0062	499	0.0146	435.9	0.0129
PSE(SNAPc)/K562-mStart-Seq/Homer	WAVTCACCMTAASYDAAAAG	0.01	-5.62	0.0072	961	0.0281	871	0.0258
Sox9(HMG)/Limb-SOX9-ChIP-Seq(GSE73225)/Homer	AGGVNCCTTTGT	0.01	-5.416	0.0088	2074	0.0606	1936.8	0.0573
HEB(bHLH)/mES-Heb-ChIP-Seq(GSE53233)/Homer	VCAGCTGBNN	0.01	-5.398	0.0089	7414	0.2167	7127.2	0.2109
Mef2b(MADS)/HEK293-Mef2b.V5-ChIP-Seq(GSE67450)/Homer	GCTATTTTTGGM	0.01	-5.351	0.0093	1645	0.0481	1525.1	0.0451
Mef2a(MADS)/HL1-Mef2a.biotin-ChIP-Seq(GSE21529)/Homer	CYAAAAATAG	0.01	-5.341	0.0093	825	0.0241	744.1	0.022
E2F7(E2F)/Hela-E2F7-ChIP-Seq(GSE32673)/Homer	VDTTTCCCGCCA	0.01	-5.27	0.0099	730	0.0213	655.4	0.0194
Tbx21(T-box)/GM12878-TBX21-ChIP-Seq(Encode)/Homer	AGGTGTGAAA	0.01	-5.133	0.0114	2439	0.0713	2292.9	0.0678
MafK(bZIP)/C2C12-MafK-ChIP-Seq(GSE36030)/Homer	GCTGASTCAGCA	0.01	-5.124	0.0114	521	0.0152	460.2	0.0136
ZNF711(Zf)/SHSY5Y-ZNF711-ChIP-Seq(GSE20673)/Homer	AGGCCTAG	0.01	-5.089	0.0118	8611	0.2516	8307.8	0.2458
Six4(Homeobox)/MCF7-SIX4-ChIP-Seq(Encode)/Homer	TGWAAYCTGABACCB	0.01	-4.962	0.0133	117	0.0034	91.7	0.0027
NPAS(bHLH)/Liver-NPAS-ChIP-Seq(GSE39860)/Homer	NVCACGTG	0.01	-4.843	0.0149	4184	0.1223	3989.8	0.118
RORg(NR)/Liver-Rorc-ChIP-Seq(GSE101115)/Homer	WAABTAGGTCAV	0.01	-4.831	0.015	185	0.0054	152.6	0.0045
OCT:OCT(POU,Homeobox)/NPC-Brn1-ChIP-Seq(GSE35496)/Homer	ATGAATATTCATGAG	0.01	-4.815	0.0152	19	0.0006	10.4	0.0003
GRE(NR),IR3/A549-GR-ChIP-Seq(GSE32465)/Homer	NRGVACABNVTGTYCY	0.01	-4.622	0.0183	313	0.0091	270.2	0.008
Nanog(Homeobox)/mES-Nanog-ChIP-Seq(GSE11724)/Homer	RGCCATTAAC	0.1	-4.466	0.0213	10395	0.3038	10076.9	0.2982
Tbr1(T-box)/Cortex-Tbr1-ChIP-Seq(GSE71384)/Homer	AAGGTGTKAA	0.1	-4.349	0.0239	3303	0.0965	3143.9	0.093
Oct2(POU,Homeobox)/Bcell-Oct2-ChIP-Seq(GSE21512)/Homer	ATATGCAAAT	0.1	-4.274	0.0256	531	0.0155	476.5	0.0141
ZNF382(Zf)/HEK293-ZNF382.GFP-ChIP-Seq(GSE58341)/Homer	GNCTGTASTRNTGBCTCHTT	0.1	-4.222	0.0269	59	0.0017	43	0.0013
NRF1(NRF)/MCF7-NRF1-ChIP-Seq(Unpublished)/Homer	CTGCGCATGCGC	0.1	-4.119	0.0297	1091	0.0319	1010.7	0.0299
DUX(Homeobox)/C2C12-Dux-ChIP-Seq(GSE87279)/Homer	BCWGATTCAATCAAN	0.1	-4.047	0.0317	6	0.0002	2.3	0.0001
PR(NR)/T47D-PR-ChIP-Seq(GSE31130)/Homer	VAGRACAKNCTGTBC	0.1	-3.965	0.0343	5566	0.1627	5358.9	0.1586
TCF4(bHLH)/SHSY5Y-TCF4-ChIP-Seq(GSE96915)/Homer	SMCATCTGKH	0.1	-3.939	0.035	4446	0.1299	4265.9	0.1262
Ap4(bHLH)/AML-Tfap4-ChIP-Seq(GSE45738)/Homer	NAHCAGCTGD	0.1	-3.904	0.0361	4079	0.1192	3908.5	0.1156
ZNF692(Zf)/HEK293-ZNF692.GFP-ChIP-Seq(GSE58341)/Homer	GTGGGCCCCA	0.1	-3.782	0.0406	733	0.0214	672.3	0.0199
Sox4(HMG)/proB-Sox4-ChIP-Seq(GSE50066)/Homer	YCTTTGTTCC	0.1	-3.768	0.041	1991	0.0582	1882.2	0.0557
ZBTB33(Zf)/GM12878-ZBTB33-ChIP-Seq(GSE32465)/Homer	GGVTCTCGCGAGAAC	0.1	-3.7	0.0437	282	0.0082	248	0.0073
Srebp2(bHLH)/HepG2-Srebp2-ChIP-Seq(GSE31477)/Homer	CGGTCACSCCAC	0.1	-3.632	0.0466	416	0.0122	373.4	0.011
PAX5(Paired,Homeobox),condensed/GM12878-PAX5-ChIP-Seq(GSE32465)/Homer	GTCACGCTCSCTGM	0.1	-3.578	0.049	309	0.009	273.7	0.0081

## Sheet: Table S7B_DARs
Table S7B. Analysis of enrichment of transcription factor binding sites (TFBSs) in differentially accessible regions (DAR)s using HOMER
Motif Name	Consensus	P-value	Log P-value	q-value (Benjamini)	# of Target Sequences with Motif(of 209)	% of Target Sequences with Motif	# of Background Sequences with Motif(of 47978)	% of Background Sequences with Motif
ETS1(ETS)/Jurkat-ETS1-ChIP-Seq(GSE17954)/Homer	ACAGGAAGTG	1e-08	-18.73	0	42	0.2593	4965.2	0.1007
BORIS(Zf)/K562-CTCFL-ChIP-Seq(GSE32465)/Homer	CNNBRGCGCCCCCTGSTGGC	1e-07	-18.14	0	20	0.1235	1299.5	0.0263
Etv2(ETS)/ES-ER71-ChIP-Seq(GSE59402)/Homer(0.967)	NNAYTTCCTGHN	1e-06	-15.26	0	35	0.216	4183.3	0.0848
ETV4(ETS)/HepG2-ETV4-ChIP-Seq(ENCODE)/Homer	ACCGGAAGTG	1e-05	-13.71	0.0001	42	0.2593	5953.2	0.1207
CTCF(Zf)/CD4+-CTCF-ChIP-Seq(Barski_et_al.)/Homer	AYAGTGCCMYCTRGTGGCCA	1e-05	-12.75	0.0002	11	0.0679	558.6	0.0113
ETV1(ETS)/GIST48-ETV1-ChIP-Seq(GSE22441)/Homer	AACCGGAAGT	1e-05	-11.92	0.0005	43	0.2654	6612.4	0.134
Fli1(ETS)/CD8-FLI-ChIP-Seq(GSE20898)/Homer	NRYTTCCGGH	0.0001	-11.17	0.0008	38	0.2346	5674.6	0.115
GABPA(ETS)/Jurkat-GABPa-ChIP-Seq(GSE17954)/Homer	RACCGGAAGT	0.0001	-11.11	0.0008	32	0.1975	4387.2	0.0889
ERG(ETS)/VCaP-ERG-ChIP-Seq(GSE14097)/Homer	ACAGGAAGTG	0.0001	-10.45	0.0013	45	0.2778	7488.3	0.1518
Elk1(ETS)/Hela-Elk1-ChIP-Seq(GSE31477)/Homer	HACTTCCGGY	0.0001	-9.28	0.0039	25	0.1543	3327.7	0.0675
EWS:FLI1-fusion(ETS)/SK_N_MC-EWS:FLI1-ChIP-Seq(SRA014231)/Homer	VACAGGAAAT	0.001	-7.213	0.0277	19	0.1173	2542.5	0.0515
ELF1(ETS)/Jurkat-ELF1-ChIP-Seq(SRA014231)/Homer	AVCCGGAAGT	0.001	-7.2	0.0277	21	0.1296	2959.9	0.06
IRF1(IRF)/PBMC-IRF1-ChIP-Seq(GSE43036)/Homer	GAAAGTGAAAGT	0.001	-7.013	0.0287	7	0.0432	461.9	0.0094
IRF3(IRF)/BMDM-Irf3-ChIP-Seq(GSE67343)/Homer	AGTTTCAKTTTC	0.01	-6.887	0.0302	11	0.0679	1088.1	0.0221
